# Supplementary material for: Identification of Serum Interleukin 6 Levels as a Disease Severity Biomarker in Facioscapulohumeral Muscular Dystrophy
Source: PubMed Central journal article supplement — J Neuromuscul Dis. 2022 Jan 4;9(1):83–93. doi: 10.3233/JND-210711 (PMC8842759; doi:10.3233/jnd-210711), 2022-01-04
Supplement: jnd-9-jnd210711-s001.pdf [file jnd-9-jnd210711-s001.pdf]

## SUPPLEMENTARY FIGURE LEGENDS

### Figure S1: Histopathology in FSHD-like mice.

Photomicrographs of tibialis anterior muscle in each group of mice: ACTA1-MCM/+ with TMX (control), ACTA1-MCM, FLExD/+ no TMX (mild) and ACTA1-MCM, FLExD/+ 7 days post-TMX (SD7). Hematoxylin and Eosin staining (a-c), DUX4 immunostaining co-localized with DAPI (d-f) or alone (g-i). Representative images are shown based on n=3-4 mice per group. White arrows indicate representative DUX4 positive myonuclei.

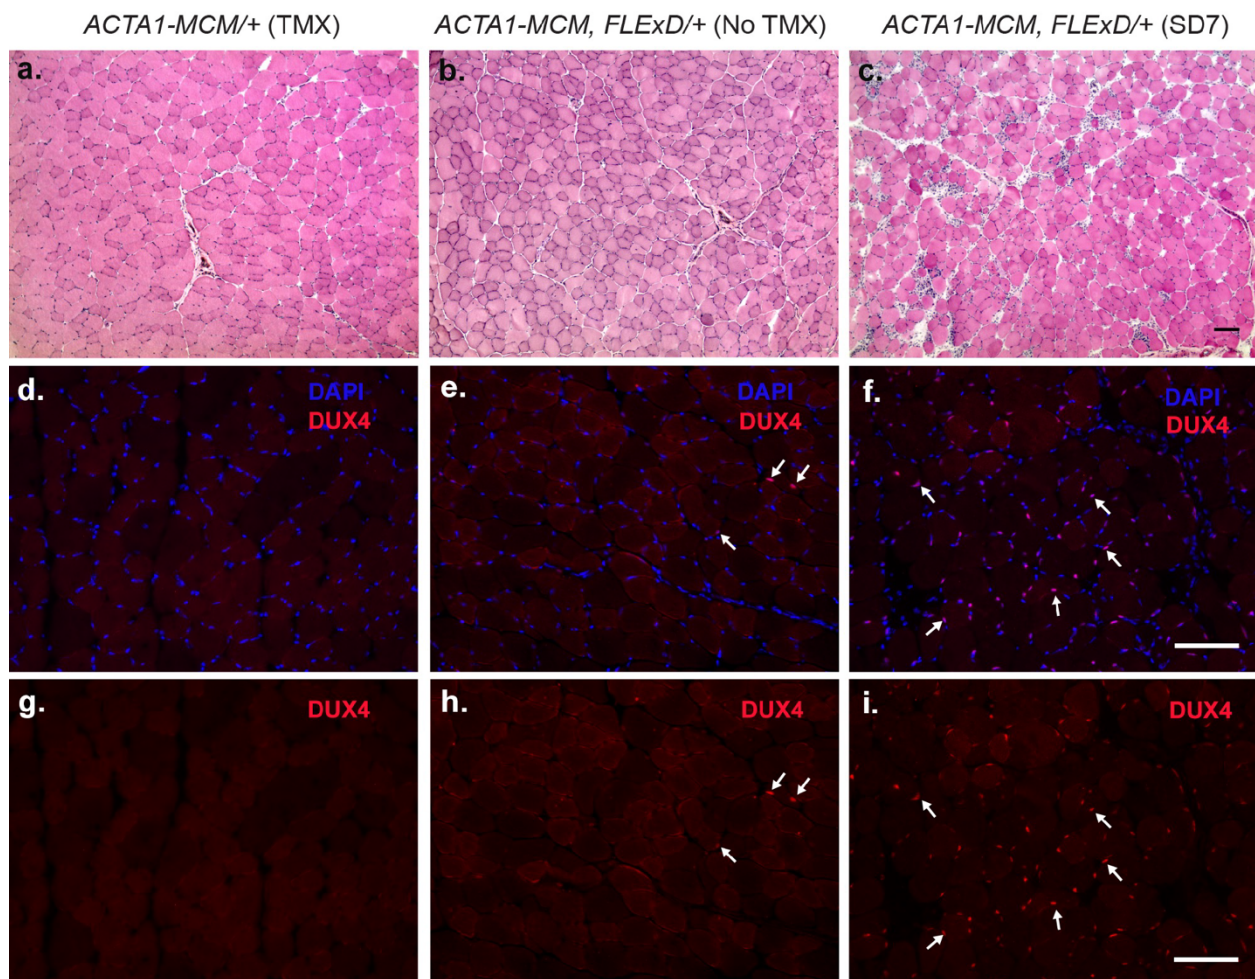

**Figure S2: Analysis of male and female FSHD-like mice.**

Male and female mice used in Figure 4 were assessed for maximum tetanus (a.), and cross-sectional muscle area normalized specific tetanus (b.) and analyzed separately by sex. IL-6 levels in the serum (c.) and gastrocnemius muscle (d.) in each group of mice: Control, blue (n=6 in serum, n=10 in muscle), Mild, green (n=8 in serum, n=10 in muscle) and SD7 (n=6 in serum, n=10 in muscle) were separated by sex. Significance: \* p<0.05, \*\* p<0.01.

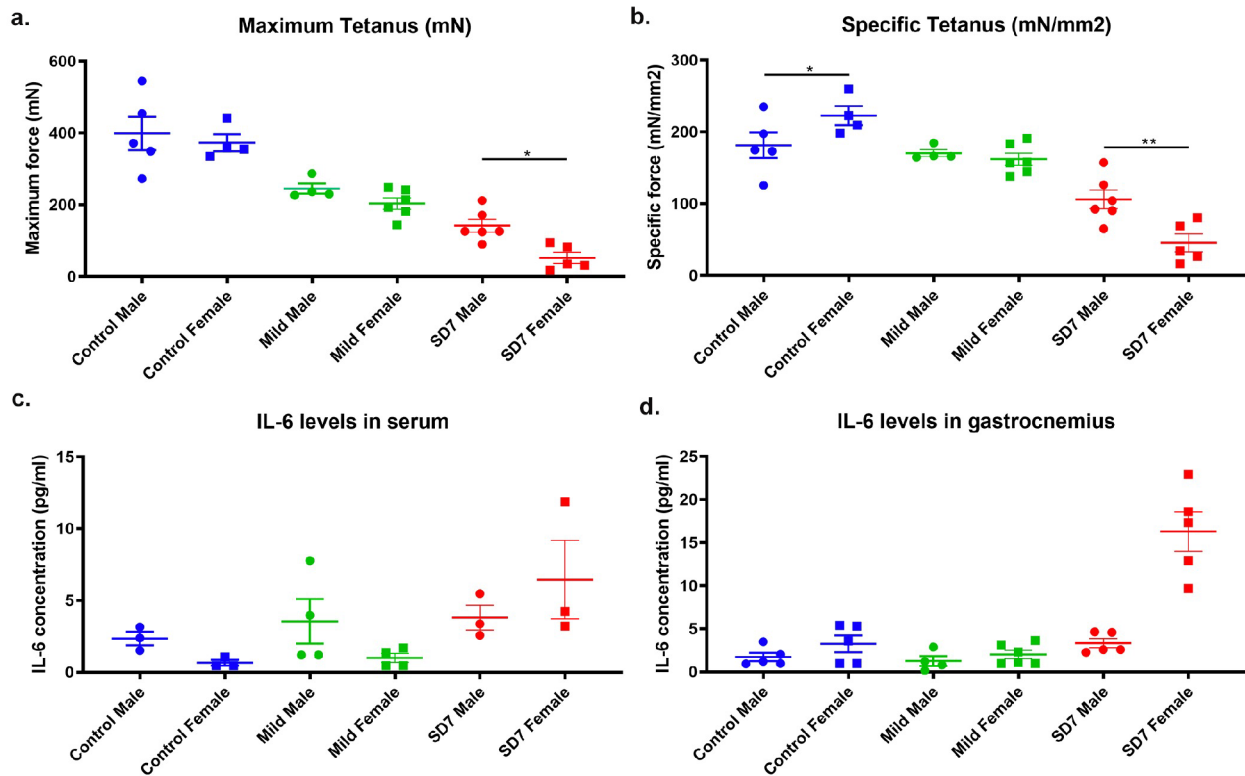

**Supplementary Table 1: Correlations between serum cytokine levels and clinical scores.**

Spearman's correlation coefficient (R) and False Discovery Rate (FDR) determination for the indicated cytokines and clinical scores in all patients, males and females.

| MMT sum score                  |              |                 |              |                 |         |      |
|--------------------------------|--------------|-----------------|--------------|-----------------|---------|------|
|                                | All          |                 | Males        |                 | Females |      |
|                                | R            | FDR             | R            | FDR             | R       | FDR  |
| <b>GM-CSF</b>                  | 0·00         | 1·00            | -0·22        | 0·20            | 0·30    | 0·12 |
| <b>IFN-<math>\gamma</math></b> | -0·20        | 0·13            | -0·17        | 0·34            | -0·06   | 0·84 |
| <b>IL-5</b>                    | 0·03         | 0·94            | 0·01         | 1·00            | 0·03    | 0·99 |
| <b>IL-6</b>                    | <b>-0·38</b> | <b>2·97E-04</b> | <b>-0·46</b> | <b>2·72E-03</b> | -0·33   | 0·10 |
| <b>IL-7</b>                    | -0·07        | 0·70            | -0·15        | 0·38            | 0·08    | 0·80 |
| <b>IL-8</b>                    | -0·09        | 0·60            | -0·23        | 0·20            | 0·01    | 0·99 |
| <b>IL-10</b>                   | 0·02         | 0·95            | -0·29        | 0·12            | 0·24    | 0·23 |
| <b>IL-12p40</b>                | -0·21        | 0·1             | -0·24        | 0·20            | -0·12   | 0·68 |
| <b>IL-15</b>                   | -0·03        | 0·94            | -0·17        | 0·34            | 0·16    | 0·55 |
| <b>IL-16</b>                   | -0·11        | 0·51            | -0·23        | 0·20            | -0·12   | 0·68 |
| <b>IL-17</b>                   | -0·14        | 0·37            | 0·00         | 1·00            | -0·15   | 0·56 |
| <b>TNF-<math>\alpha</math></b> | -0·15        | 0·30            | -0·25        | 0·20            | -0·08   | 0·80 |
| <b>TNF-<math>\beta</math></b>  | 0·10         | 0·57            | -0·03        | 1·00            | 0·32    | 0·10 |
| <b>VEGF</b>                    | 0·05         | 0·83            | 0·07         | 0·79            | 0·01    | 0·99 |

| Brooke score                   |             |                 |             |                 |         |      |
|--------------------------------|-------------|-----------------|-------------|-----------------|---------|------|
|                                | All         |                 | Males       |                 | Females |      |
|                                | R           | FDR             | R           | FDR             | R       | FDR  |
| <b>GM-CSF</b>                  | 0·06        | 0·70            | 0·27        | 0·16            | -0·19   | 0·38 |
| <b>IFN-<math>\gamma</math></b> | 0·10        | 0·50            | 0·15        | 0·39            | 0·02    | 0·95 |
| <b>IL-5</b>                    | -0·05       | 0·71            | 0·05        | 0·83            | -0·19   | 0·38 |
| <b>IL-6</b>                    | <b>0·31</b> | <b>6·82E-03</b> | <b>0·30</b> | <b>1·27E-01</b> | 0·32    | 0·12 |
| <b>IL-7</b>                    | -0·07       | 0·70            | 0·09        | 0·60            | -0·26   | 0·19 |
| <b>IL-8</b>                    | 0·14        | 0·30            | 0·21        | 0·31            | 0·09    | 0·73 |
| <b>IL-10</b>                   | 0·10        | 0·50            | 0·16        | 0·37            | 0·05    | 0·90 |
| <b>IL-12p40</b>                | 0·26        | 0·03            | 0·28        | 0·14            | 0·23    | 0·28 |
| <b>IL-15</b>                   | 0·10        | 0·50            | 0·17        | 0·37            | -0·02   | 0·95 |
| <b>IL-16</b>                   | 0·16        | 0·24            | 0·18        | 0·37            | 0·16    | 0·49 |
| <b>IL-17</b>                   | 0·02        | 0·93            | -0·03       | 0·87            | 0·05    | 0·90 |
| <b>TNF-<math>\alpha</math></b> | 0·19        | 0·14            | 0·24        | 0·21            | 0·13    | 0·53 |
| <b>TNF-<math>\beta</math></b>  | -0·03       | 0·86            | 0·16        | 0·37            | -0·27   | 0·19 |
| <b>VEGF</b>                    | -0·15       | 0·29            | -0·16       | 0·37            | -0·13   | 0·53 |

| Vignos score  |             |                 |             |                 |             |             |
|---------------|-------------|-----------------|-------------|-----------------|-------------|-------------|
|               | All         |                 | Males       |                 | Females     |             |
|               | R           | FDR             | R           | FDR             | R           | FDR         |
| GM-CSF        | -0.03       | 0.90            | 0.14        | 0.43            | -0.23       | 0.46        |
| IFN- $\gamma$ | 0.29        | 0.01            | 0.26        | 0.12            | 0.19        | 0.56        |
| IL-5          | 0.00        | 1.00            | 0.04        | 0.83            | -0.06       | 0.96        |
| IL-6          | <b>0.47</b> | <b>3.29E-06</b> | <b>0.56</b> | <b>1.08E-04</b> | <b>0.38</b> | <b>0.03</b> |
| IL-7          | 0.05        | 0.86            | 0.10        | 0.57            | -0.04       | 0.96        |
| IL-8          | 0.17        | 0.19            | 0.26        | 0.12            | 0.12        | 0.75        |
| IL-10         | 0.03        | 0.90            | 0.29        | 0.10            | -0.16       | 0.57        |
| IL-12p40      | 0.18        | 0.19            | 0.23        | 0.17            | 0.07        | 0.96        |
| IL-15         | 0.15        | 0.25            | 0.29        | 0.10            | -0.05       | 0.96        |
| IL-16         | 0.12        | 0.36            | 0.26        | 0.12            | 0.02        | 0.96        |
| IL-17         | 0.16        | 0.20            | 0.07        | 0.72            | 0.19        | 0.56        |
| TNF- $\alpha$ | 0.25        | 0.04            | 0.31        | 0.09            | 0.17        | 0.57        |
| TNF- $\beta$  | 0.02        | 0.96            | 0.14        | 0.43            | -0.14       | 0.62        |
| VEGF          | -0.10       | 0.51            | -0.19       | 0.25            | 0.02        | 0.96        |

| CSS           |             |                 |             |                 |             |             |
|---------------|-------------|-----------------|-------------|-----------------|-------------|-------------|
|               | All         |                 | Males       |                 | Females     |             |
|               | R           | FDR             | R           | FDR             | R           | FDR         |
| GM-CSF        | 0.03        | 0.92            | 0.21        | 0.26            | -0.18       | 0.60        |
| IFN- $\gamma$ | 0.24        | 0.05            | 0.31        | 0.09            | 0.07        | 0.91        |
| IL-5          | 0.03        | 0.92            | 0.08        | 0.66            | 0.00        | 1.00        |
| IL-6          | <b>0.48</b> | <b>1.26E-06</b> | <b>0.59</b> | <b>2.19E-05</b> | <b>0.36</b> | <b>0.05</b> |
| IL-7          | 0.09        | 0.65            | 0.14        | 0.50            | -0.03       | 0.93        |
| IL-8          | 0.09        | 0.65            | 0.17        | 0.38            | 0.04        | 0.92        |
| IL-10         | 0.07        | 0.76            | 0.28        | 0.12            | -0.09       | 0.85        |
| IL-12p40      | 0.22        | 0.07            | 0.23        | 0.21            | 0.14        | 0.64        |
| IL-15         | 0.05        | 0.81            | 0.12        | 0.56            | -0.06       | 0.91        |
| IL-16         | 0.08        | 0.67            | 0.17        | 0.38            | 0.05        | 0.91        |
| IL-17         | 0.22        | 0.07            | 0.09        | 0.66            | 0.25        | 0.27        |
| TNF- $\alpha$ | 0.19        | 0.12            | 0.25        | 0.17            | 0.15        | 0.64        |
| TNF- $\beta$  | -0.01       | 1.00            | 0.07        | 0.72            | -0.15       | 0.64        |
| VEGF          | 0.00        | 1.00            | -0.05       | 0.78            | 0.10        | 0.82        |

| Age-corrected CSS              |             |                 |             |                 |         |      |
|--------------------------------|-------------|-----------------|-------------|-----------------|---------|------|
|                                | All         |                 | Males       |                 | Females |      |
|                                | R           | FDR             | R           | FDR             | R       | FDR  |
| <b>GM-CSF</b>                  | 0.08        | 0.62            | 0.20        | 0.29            | -0.02   | 0.95 |
| <b>IFN-<math>\gamma</math></b> | 0.07        | 0.64            | 0.29        | 0.11            | -0.21   | 0.39 |
| <b>IL-5</b>                    | -0.08       | 0.62            | 0.06        | 0.78            | -0.21   | 0.39 |
| <b>IL-6</b>                    | <b>0.07</b> | <b>6.24E-01</b> | <b>0.31</b> | <b>9.17E-02</b> | -0.18   | 0.47 |
| <b>IL-7</b>                    | 0.12        | 0.61            | 0.14        | 0.49            | 0.09    | 0.78 |
| <b>IL-8</b>                    | -0.10       | 0.62            | 0.00        | 1.00            | -0.18   | 0.47 |
| <b>IL-10</b>                   | 0.18        | 0.26            | 0.31        | 0.09            | 0.14    | 0.61 |
| <b>IL-12p40</b>                | 0.12        | 0.61            | 0.12        | 0.58            | 0.07    | 0.85 |
| <b>IL-15</b>                   | -0.04       | 0.74            | 0.10        | 0.69            | -0.24   | 0.37 |
| <b>IL-16</b>                   | 0.11        | 0.61            | 0.28        | 0.11            | -0.02   | 0.95 |
| <b>IL-17</b>                   | -0.07       | 0.62            | -0.15       | 0.49            | -0.05   | 0.91 |
| <b>TNF-<math>\alpha</math></b> | 0.02        | 0.92            | 0.25        | 0.15            | -0.27   | 0.37 |
| <b>TNF-<math>\beta</math></b>  | -0.06       | 0.69            | 0.05        | 0.78            | -0.15   | 0.59 |
| <b>VEGF</b>                    | -0.09       | 0.62            | -0.07       | 0.78            | -0.09   | 0.78 |

Supplementary Table 2: Control demographics

|                    | All (n=50)     | Males (n=25)   | Females (n=25) | Males vs. Females p-value |
|--------------------|----------------|----------------|----------------|---------------------------|
| <b>Age at Exam</b> | 54.8 $\pm$ 6.4 | 55.1 $\pm$ 7.1 | 54.6 $\pm$ 5.7 | P=0.88                    |
